# Supplementary material for: Cp*CoIII-catalyzed formal [4 + 2] cycloaddition of 2-phenyl-1H-imidazoles to afford imidazo[1,2-c]quinazoline derivatives
Source: Royal Society of Chemistry journal article supplement (doi:10.1039/d2ob00697a), 2022-01-01

## Cp\*Co<sup>III</sup>-catalyzed formal [4 + 2] cycloaddition of 2-phenyl-1*H*-imidazoles to afford imidazo[1,2-*c*]quinazoline derivatives

Deyu Wu,<sup>a,b</sup> Zhengqiang Liu,<sup>a,b</sup> Yiting Chang,<sup>a,b</sup> Jiajing Chen,<sup>a,b</sup> Haixiang Qi,<sup>a,b</sup> Yi Dong,<sup>\*a,b,c</sup> Heng Xu<sup>\*a,b</sup>

<sup>a</sup> State Key Laboratory of Bioactive Substance and Function of Natural Medicines, Institute of Materia Medica, Chinese Academy of Medical Sciences and Peking Union Medical College, Beijing 100050, China

<sup>b</sup> Beijing Key Laboratory of Active Substances Discovery and Drugability Evaluation, Institute of Materia Medica, Chinese Academy of Medical Sciences and Peking Union Medical College, Beijing 100050, China

<sup>c</sup> State Key Laboratory of Functions and Applications of Medicinal Plants, Guizhou Medical University, Guiyang 550014, China.

E-mail: dongyi@imm.ac.cn; xuheng@imm.ac.cn

## ***Table of cotent***

*H/D exchange experiment.....S1*

*KIE experiment.....S1*

*Copies of NMR spectra of products.....S2*

## H/D exchange experiment

A mixture of [CoCp\*(CO)<sub>2</sub>] (15.0 mol%), AgSbF<sub>6</sub> (30 mol%) and 2-phenyl-1*H*-imidazole **1a** (0.2 mmol) in 2.0 mL DCE and 0.5 mL [D<sub>4</sub>]-MeOD was heated at 120°C, and stirred overnight. Then the reaction mixture was cooled to room temperature and filtered, the filtrate was concentrated and the residue was purified with preparative TLC to afford **1a**/[D]-**1a** (24 mg).

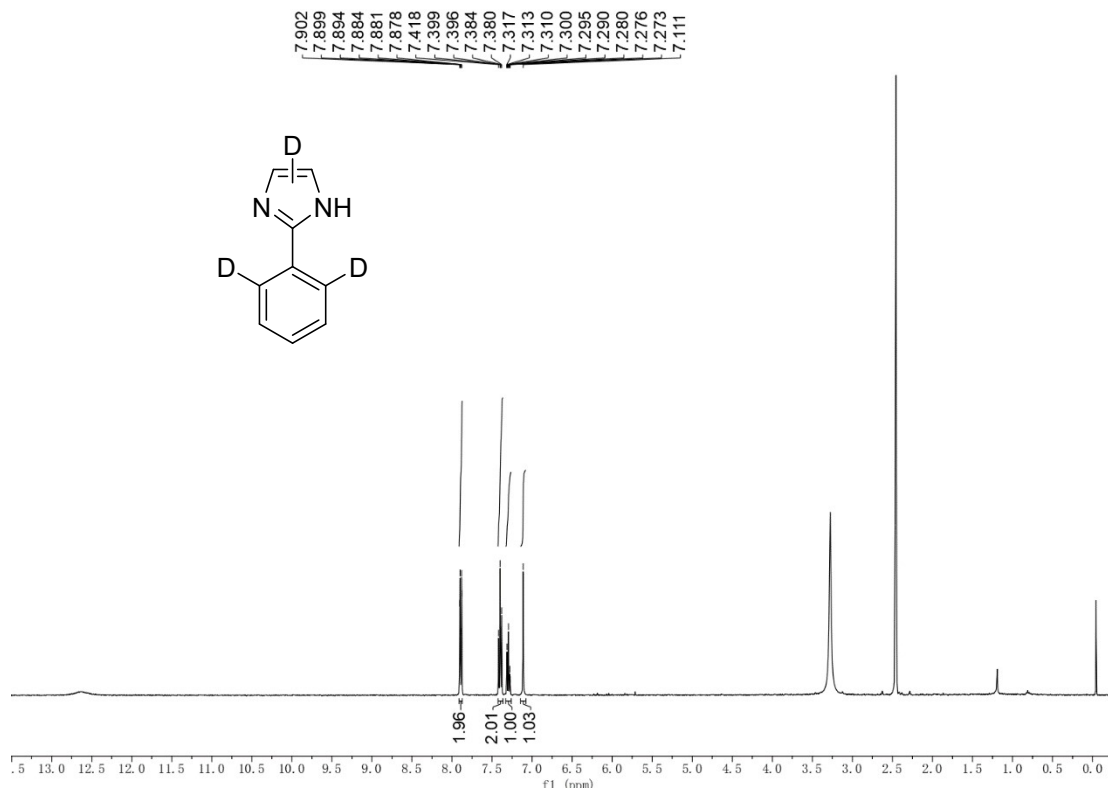

## KIE experiment

A mixture of [CoCp\*(CO)<sub>2</sub>] (15.0 mol%), AgSbF<sub>6</sub> (30 mol%) and 2-phenyl-1*H*-imidazole **1a** (0.2 mmol) or deuterated [D]-**1a** (0.2 mmol) and 3-phenyl-1,4,2-dioxazol-5-one **2a** (0.3 mmol) in 2.0 mL DCE was heated at 120°C for 45 min. Then the reaction mixture was cooled to room temperature and filtered, the filtrate was concentrated and the residue was purified with preparative TLC to afford the desired product **3** (6.5 mg) or [D]-**3** (5 mg). KIE ≈ 1.3

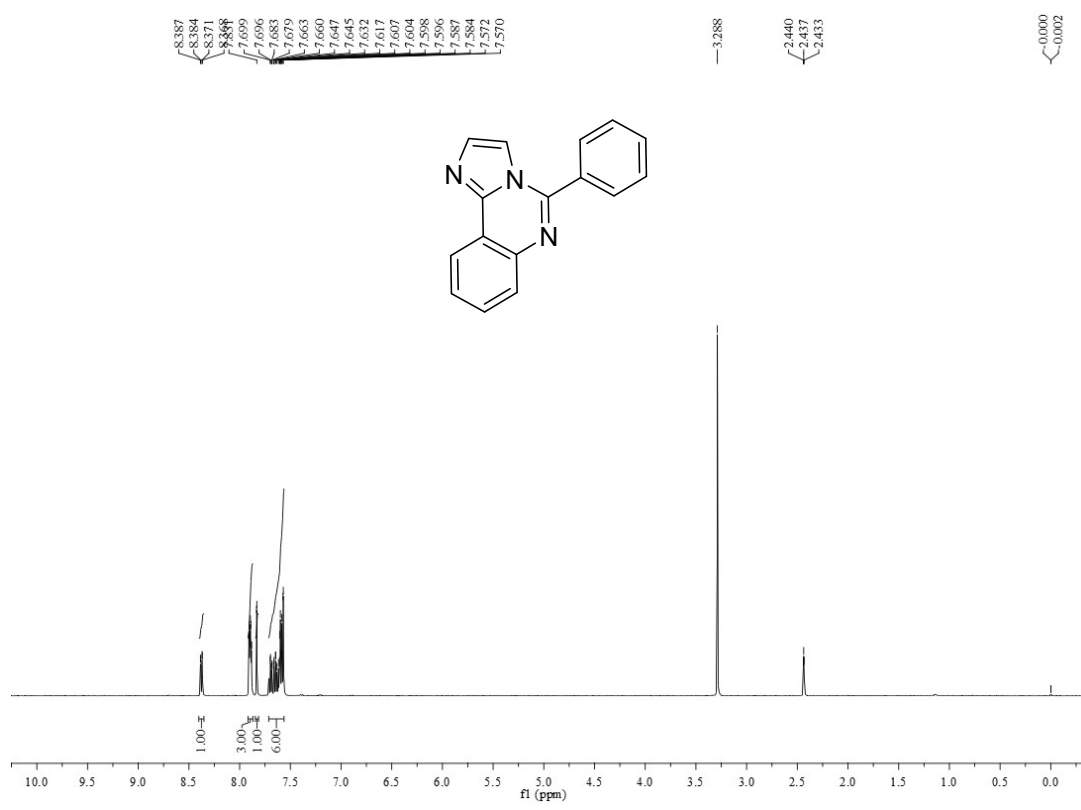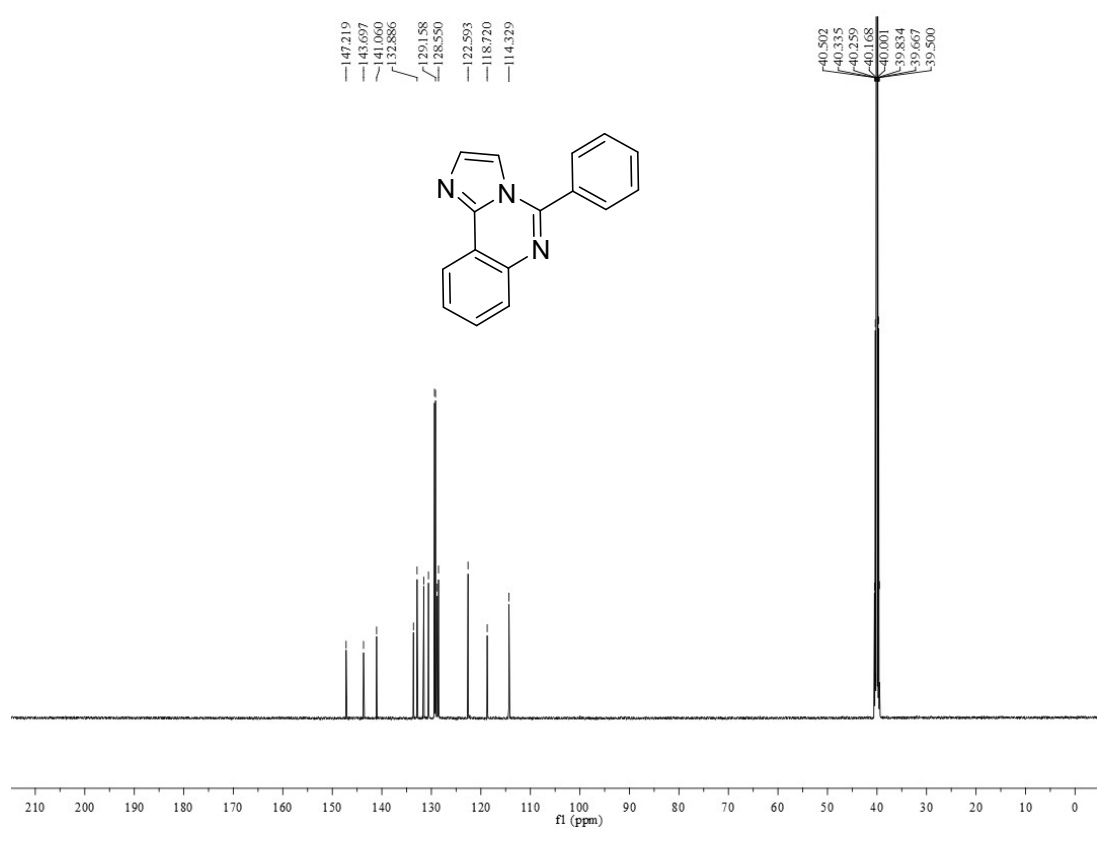

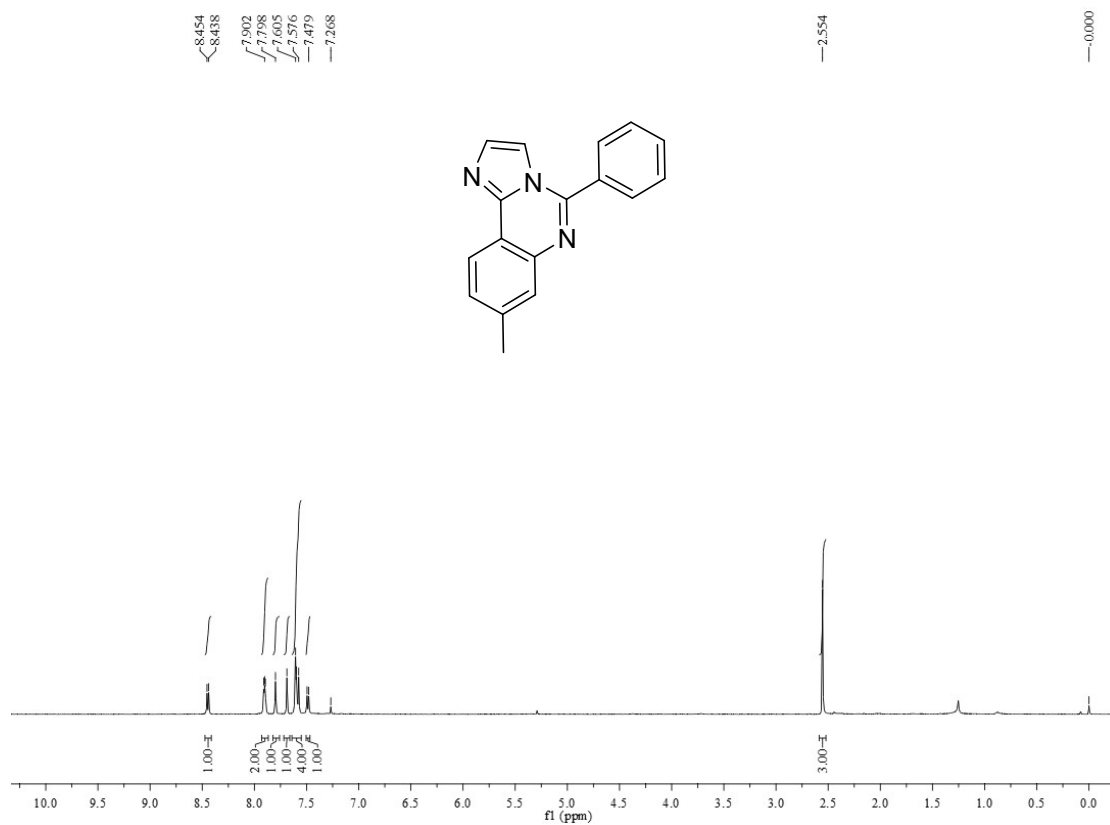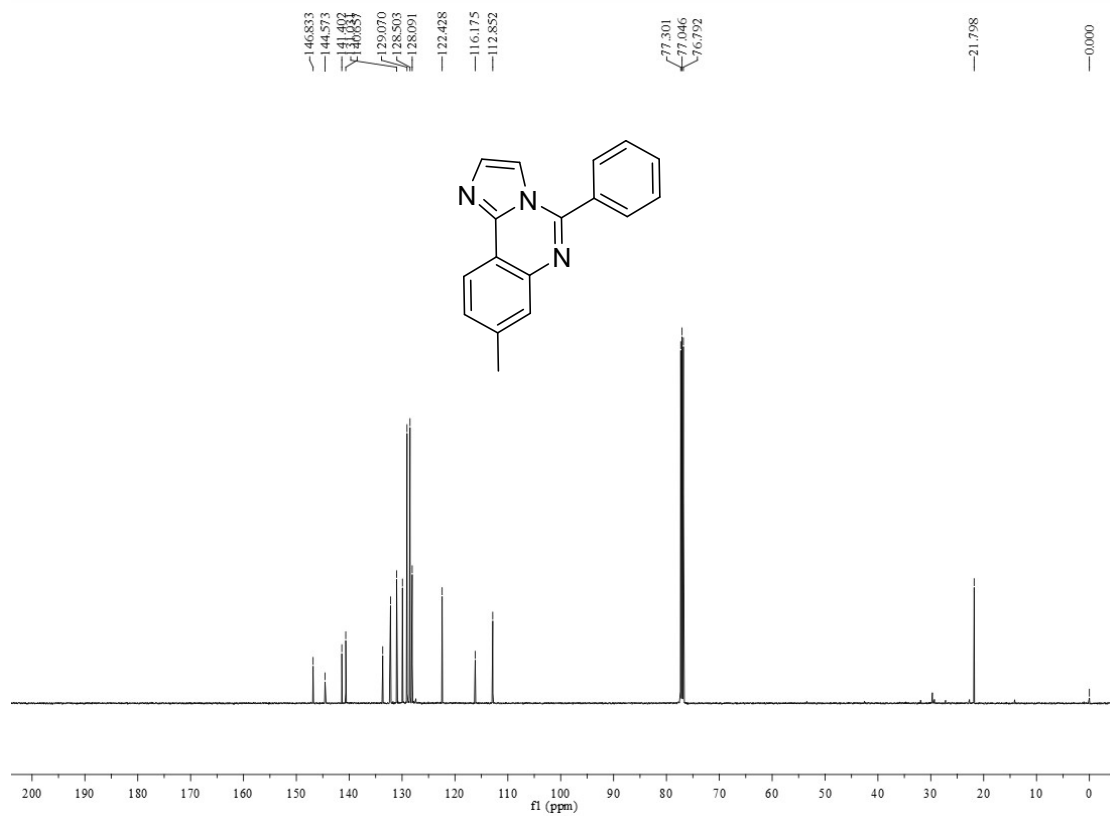

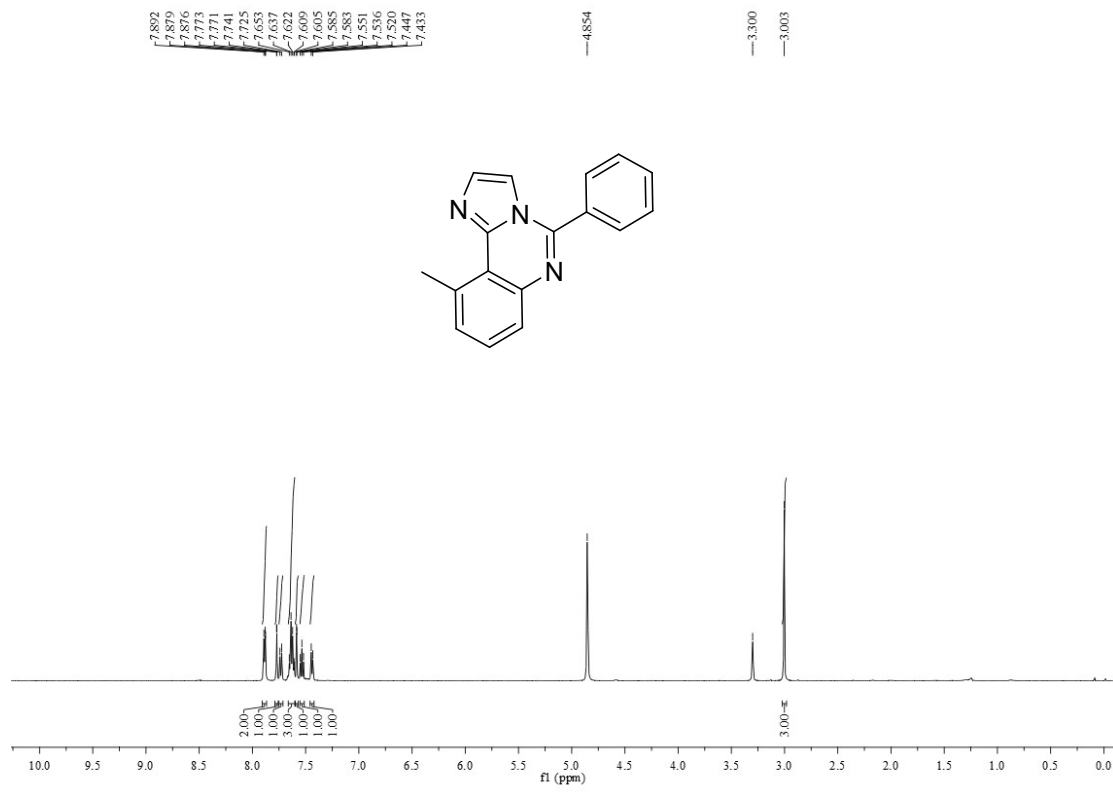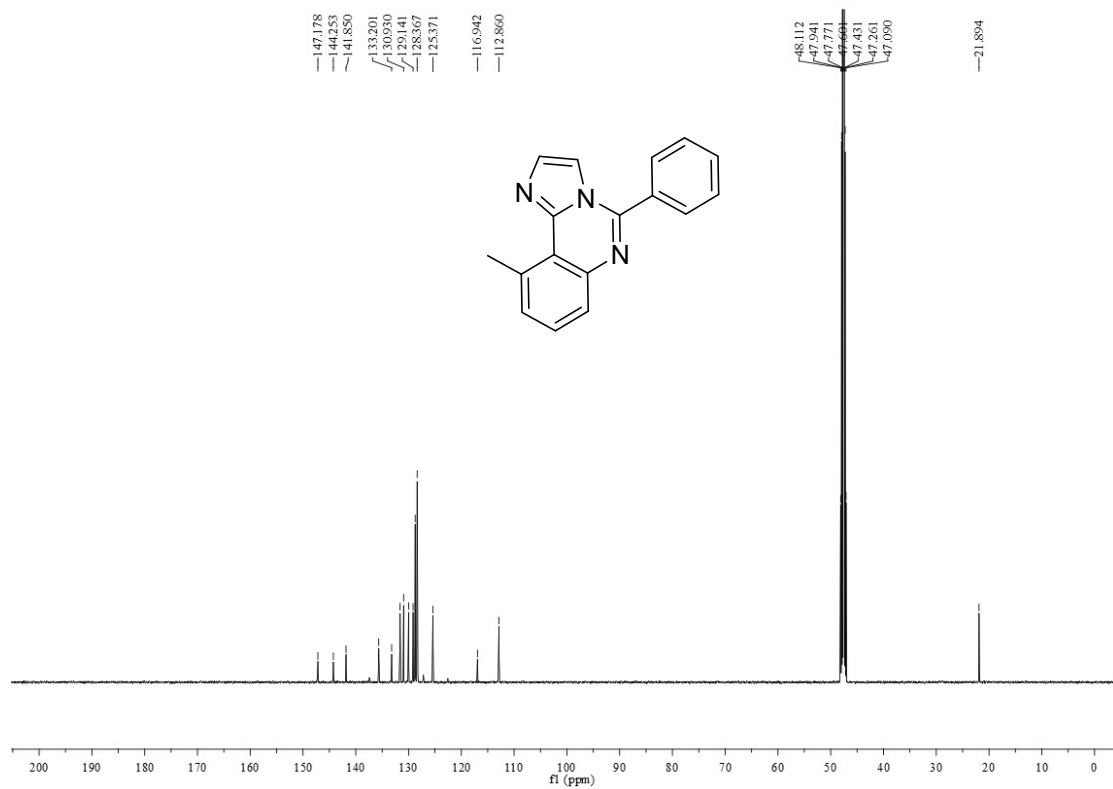

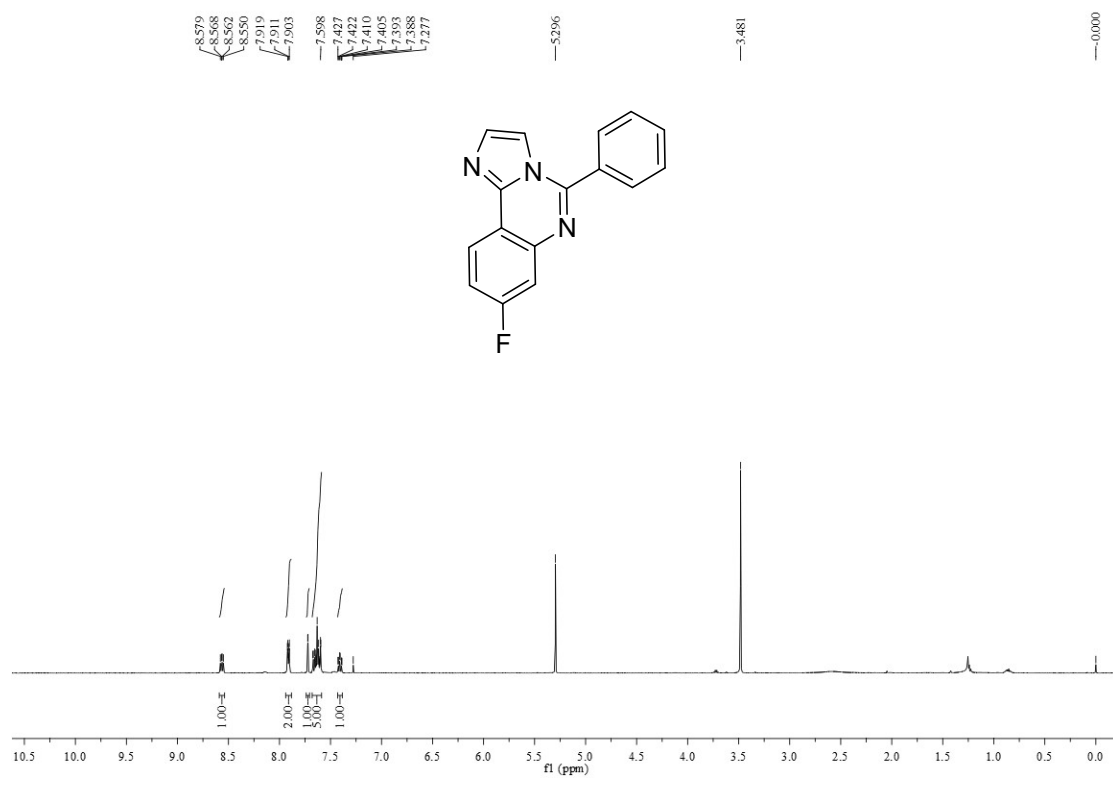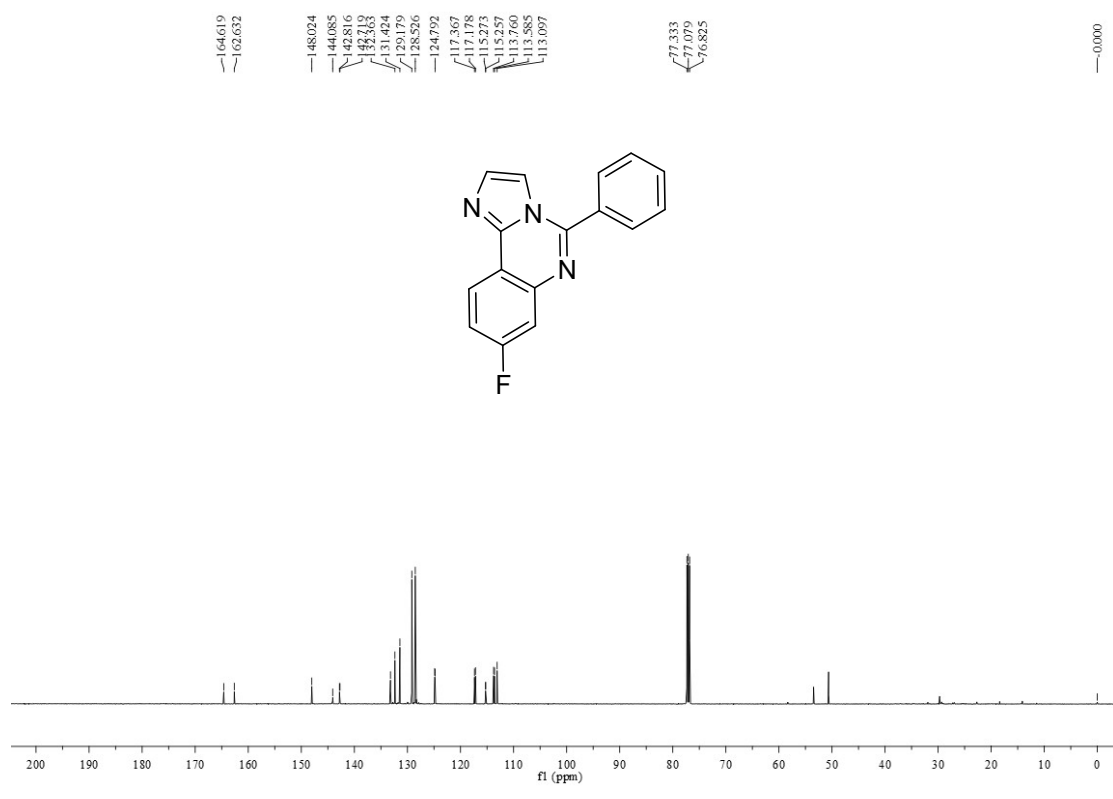

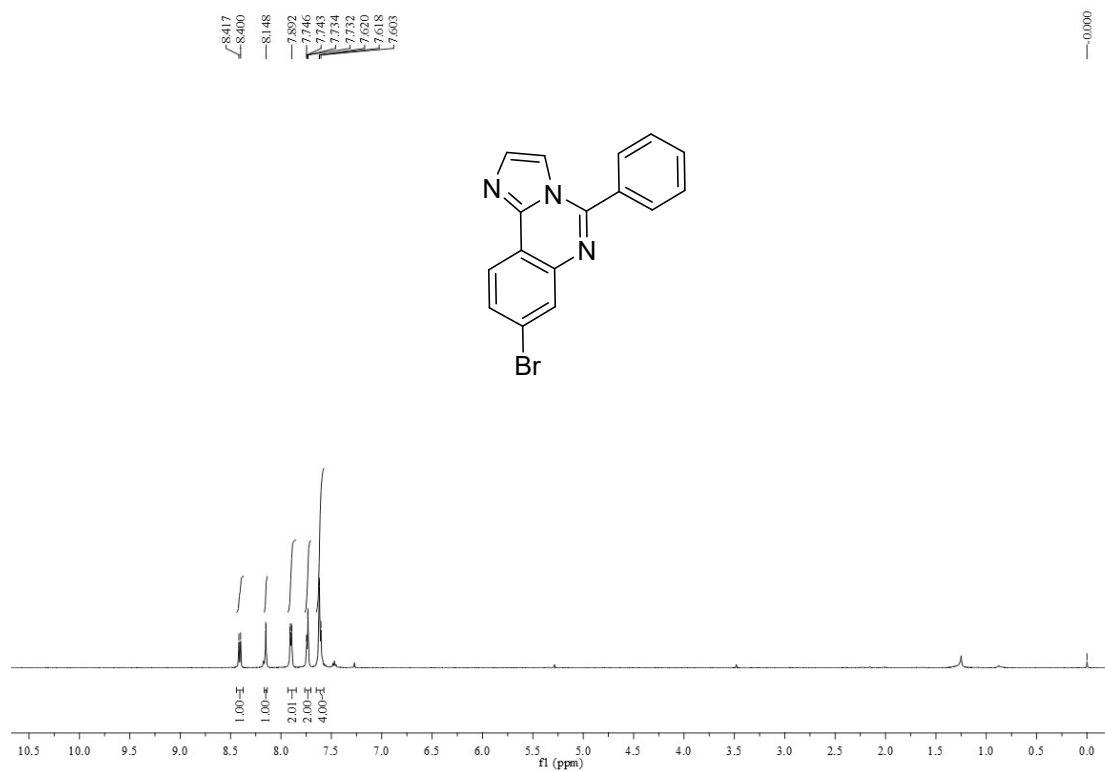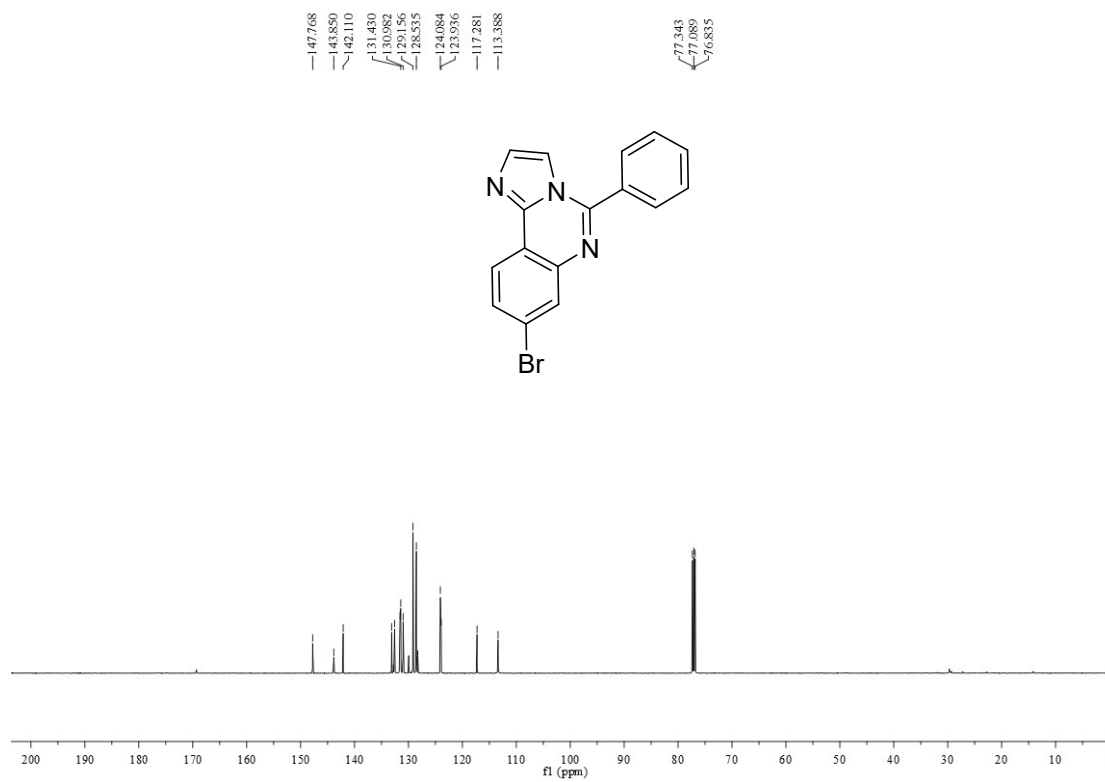



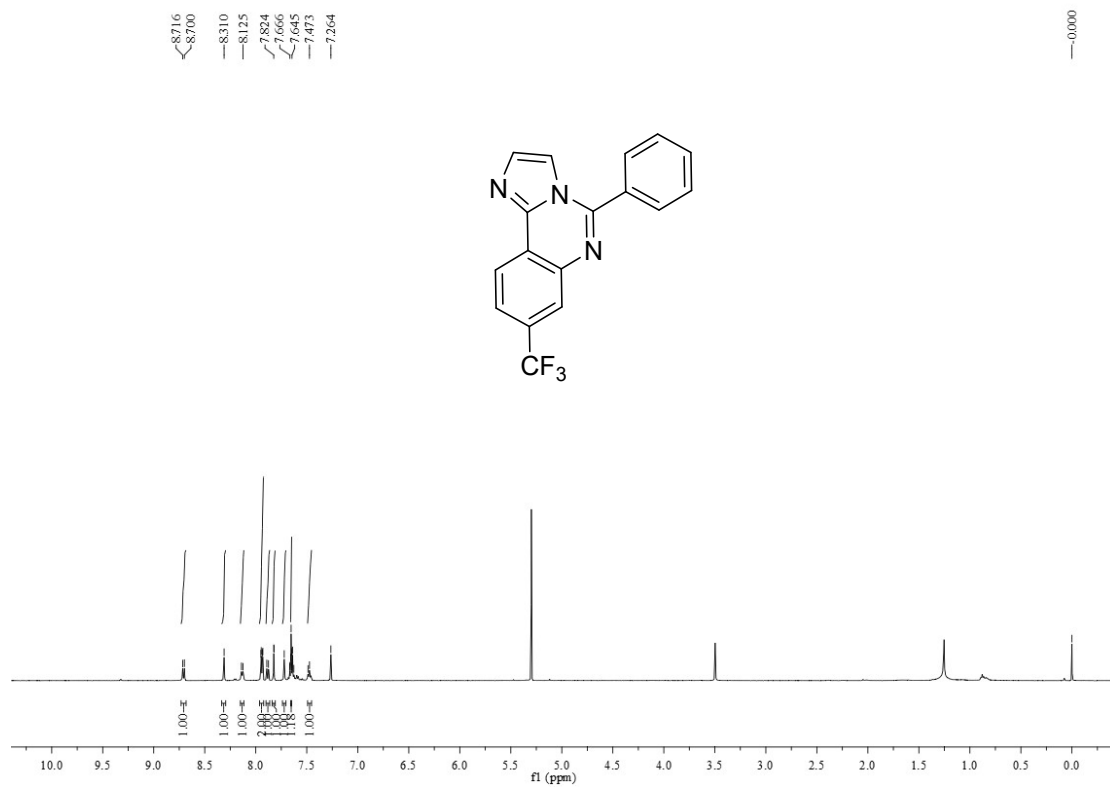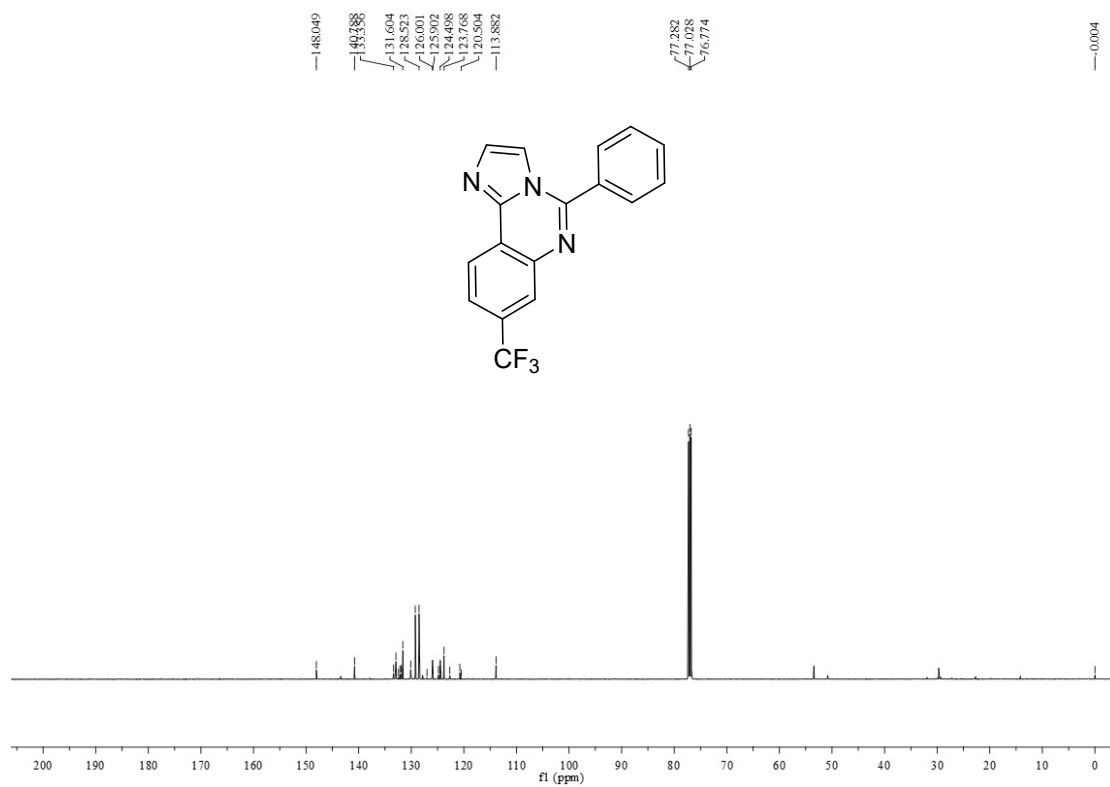

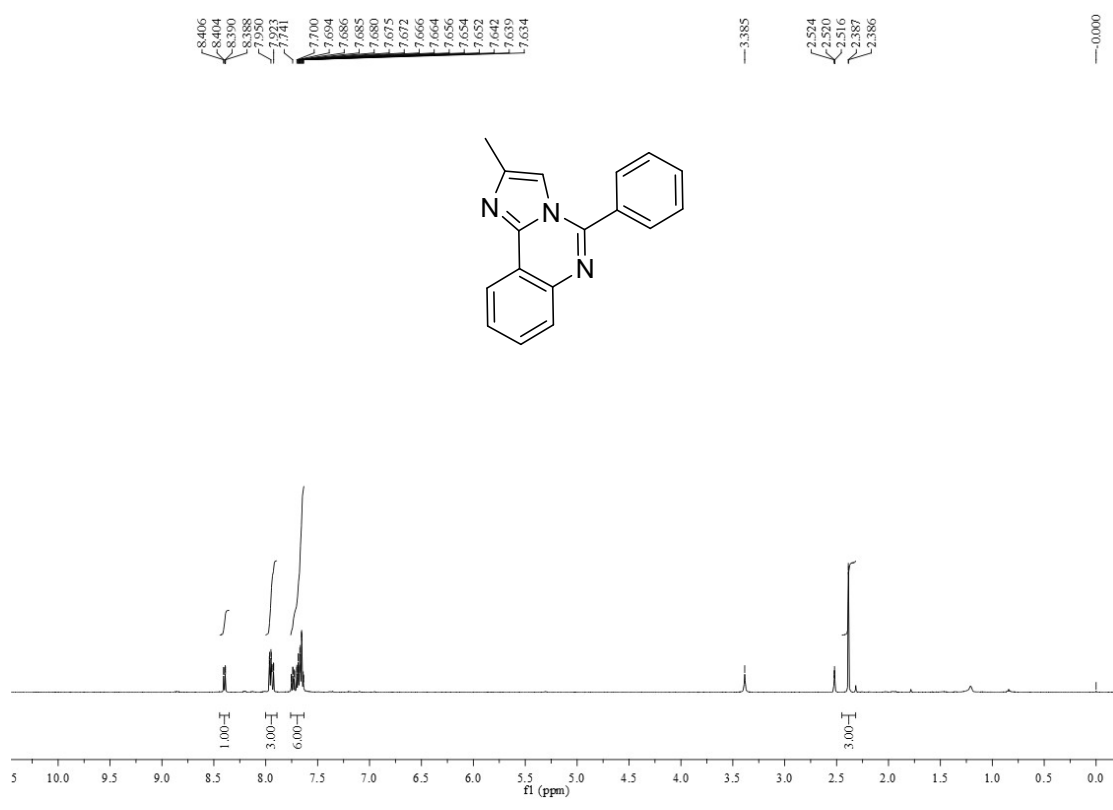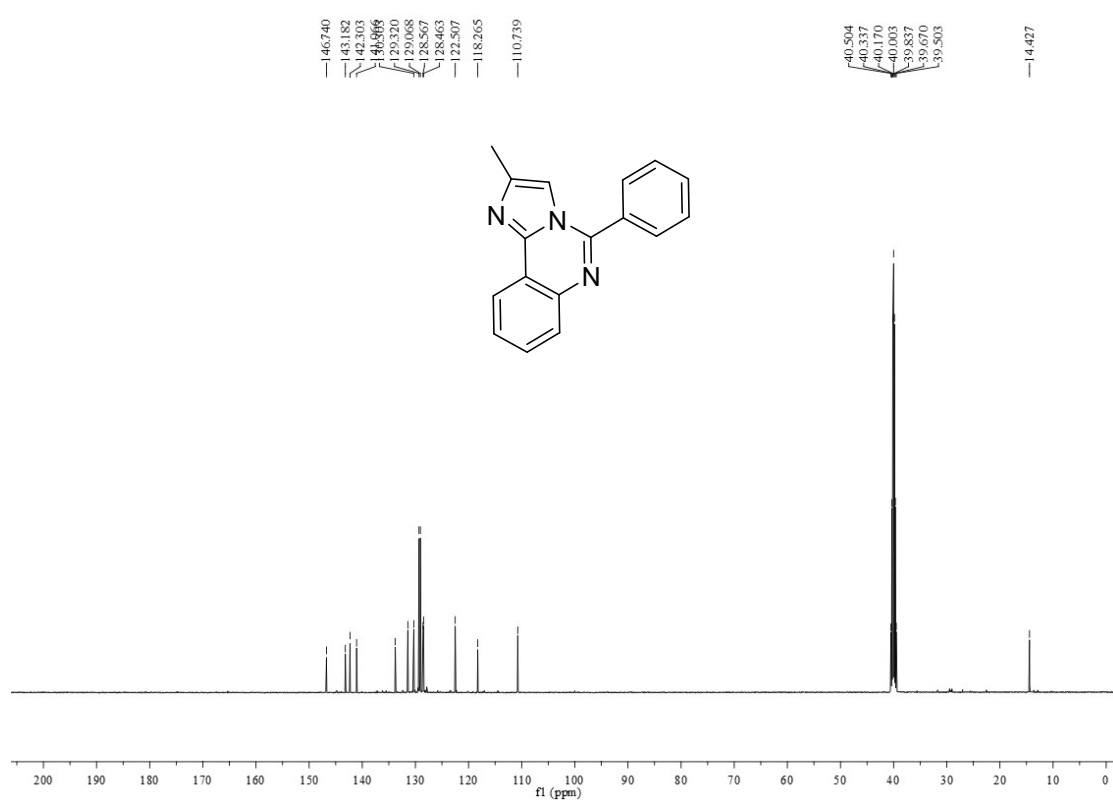

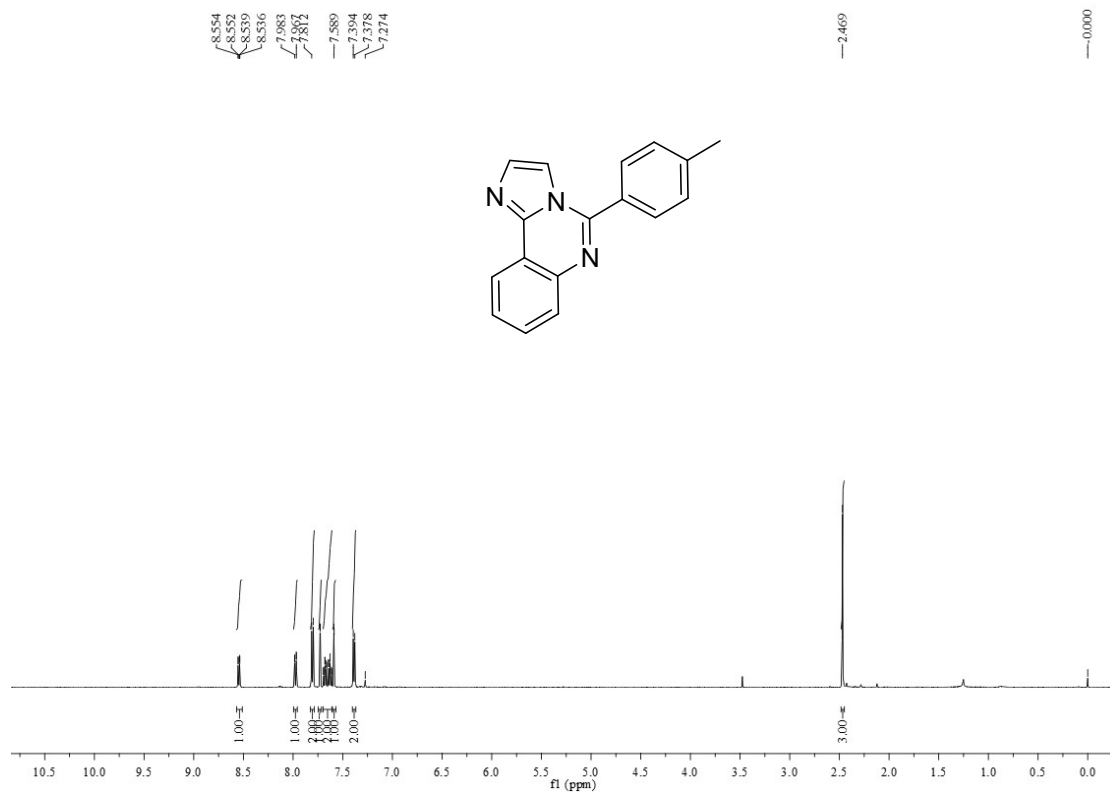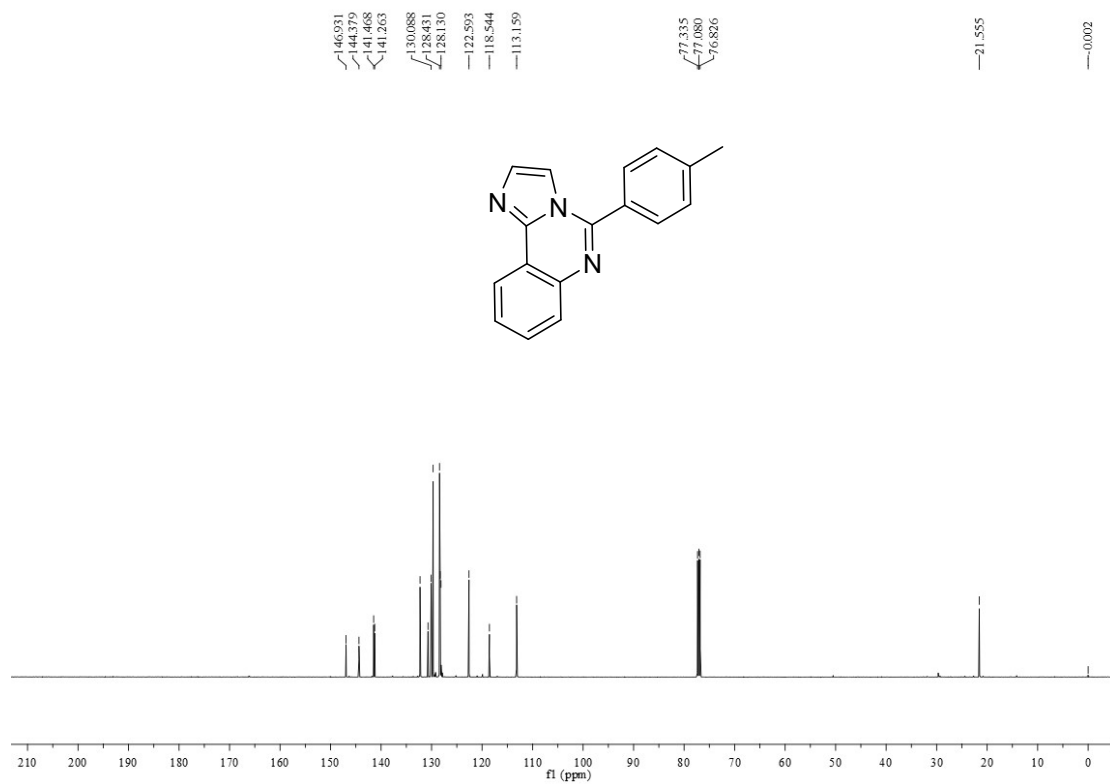

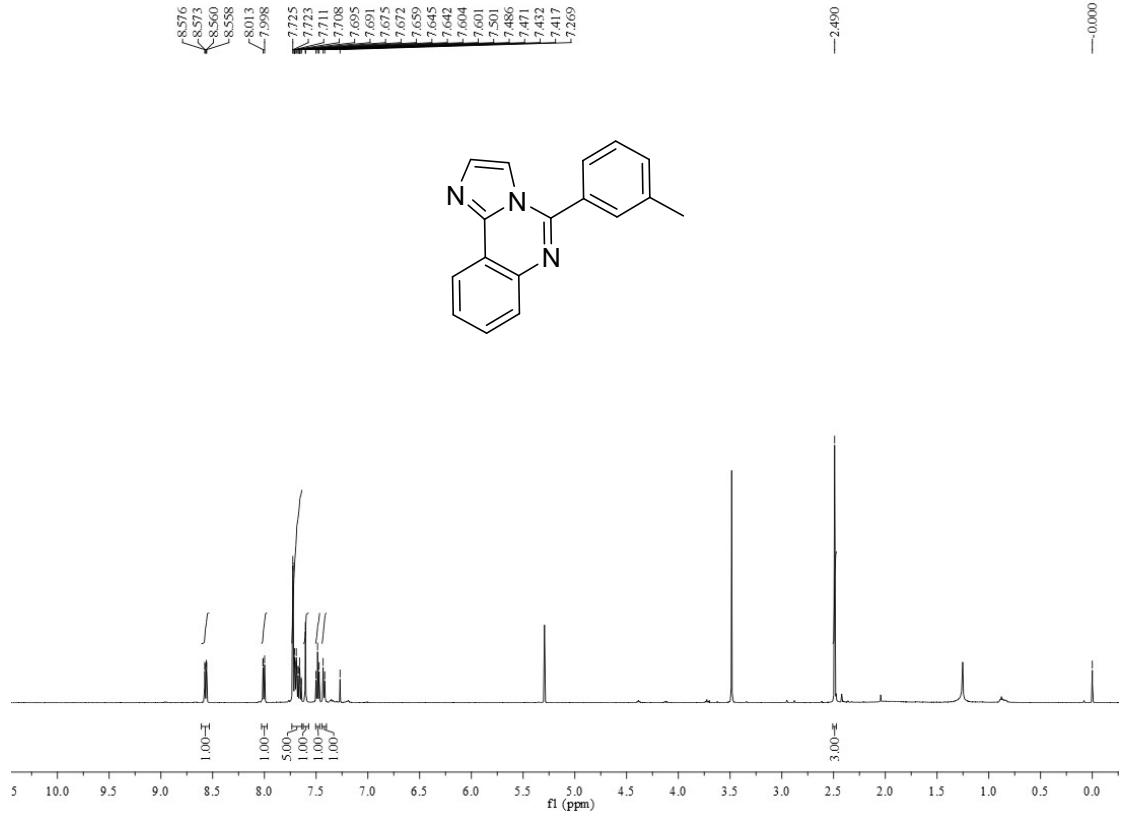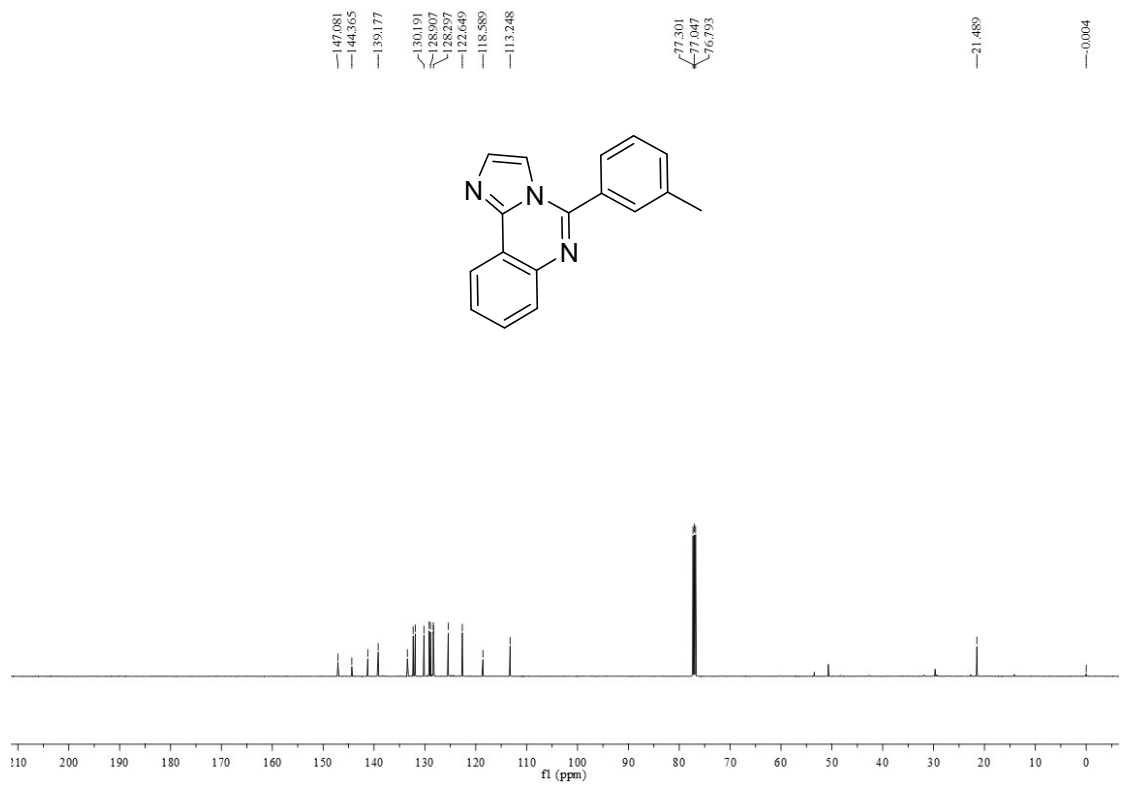

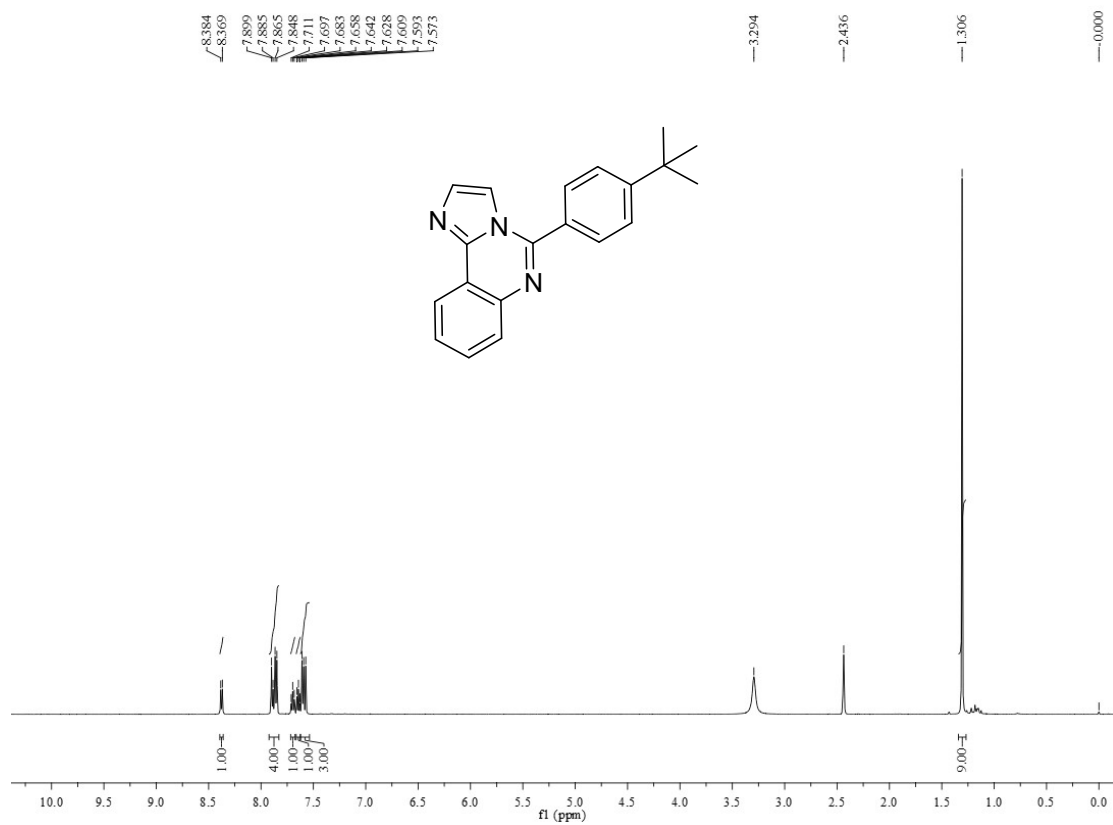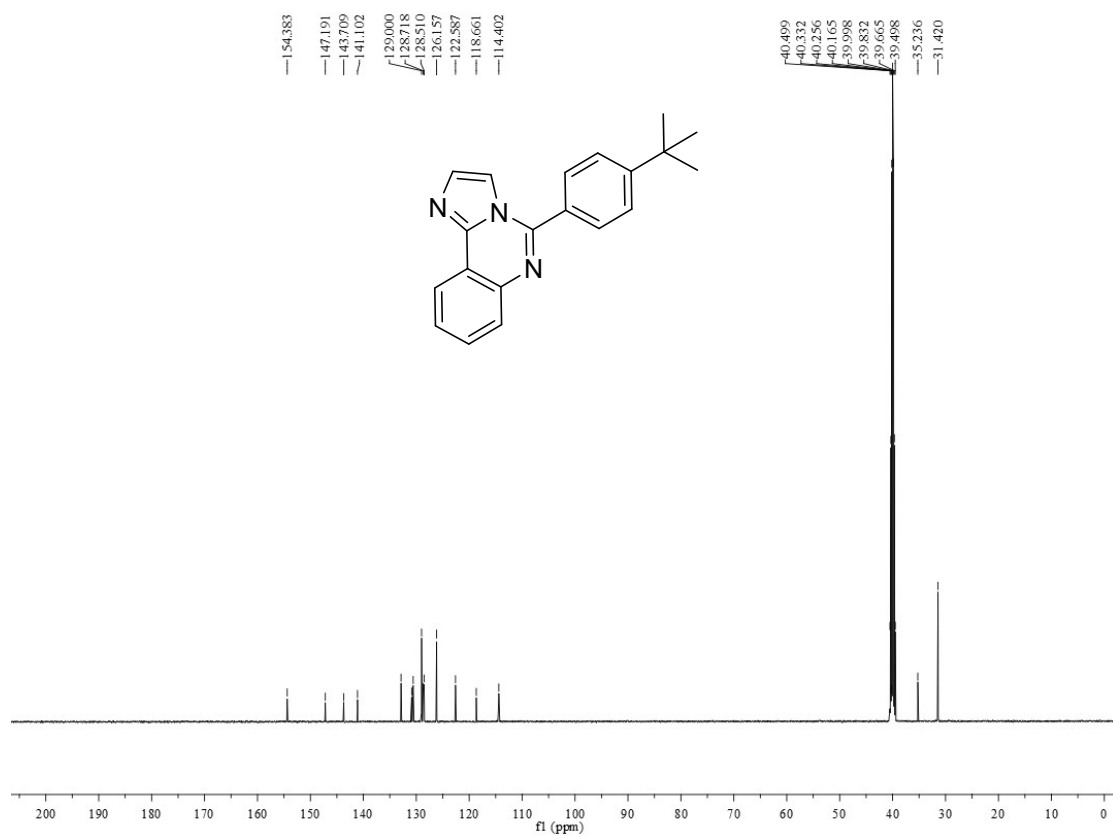

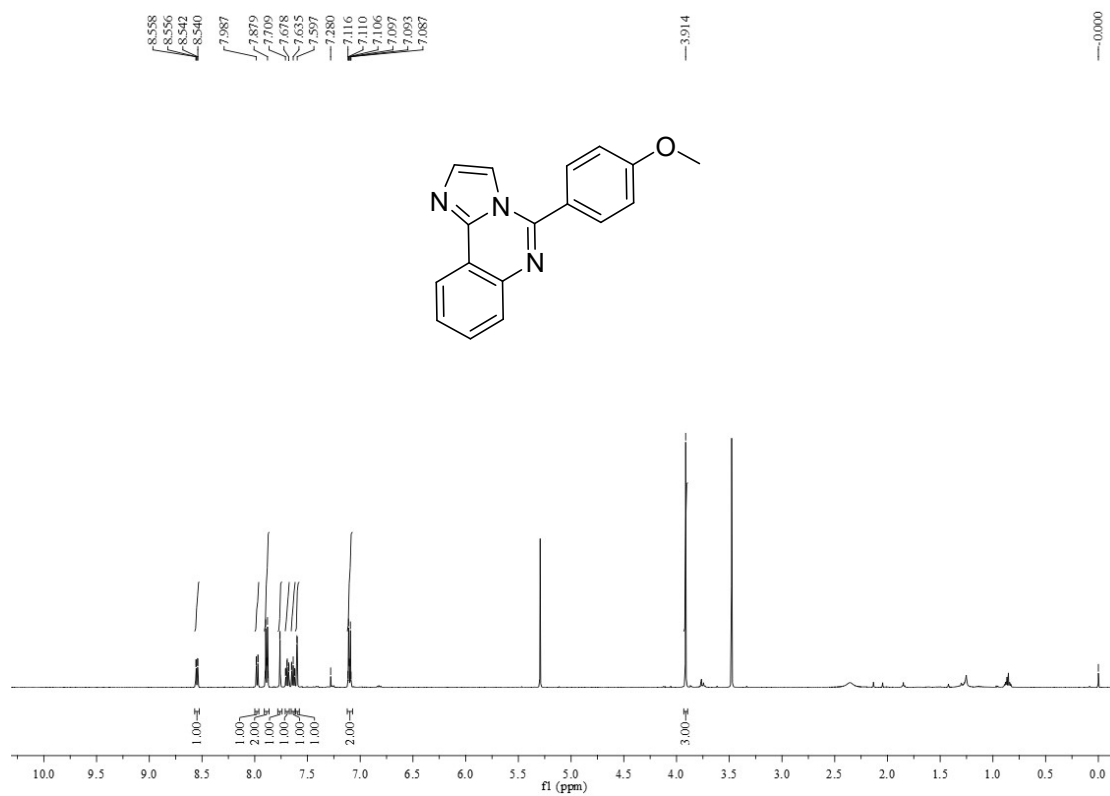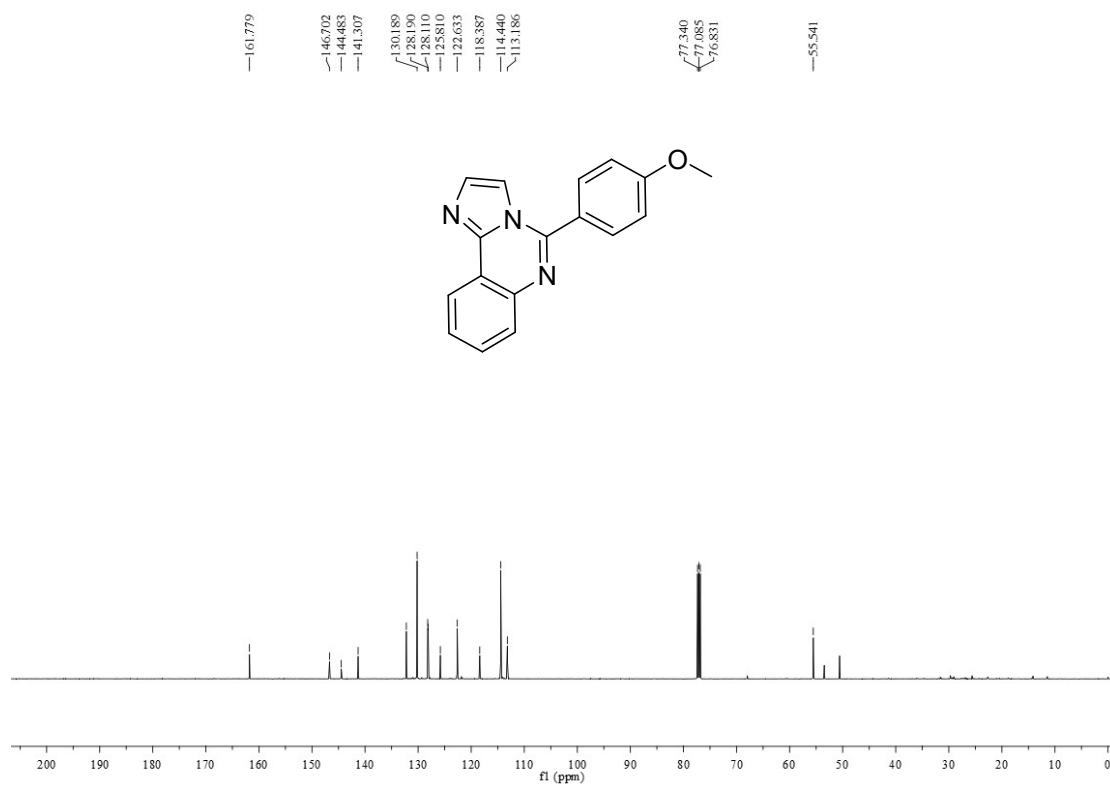

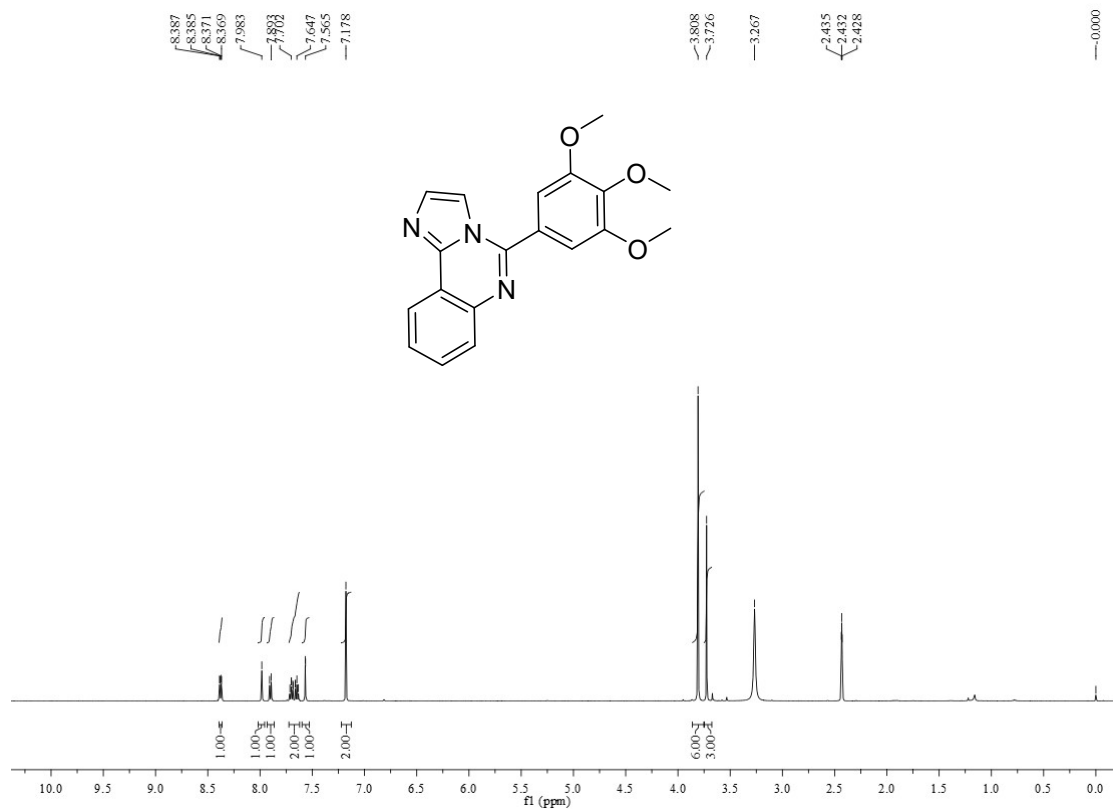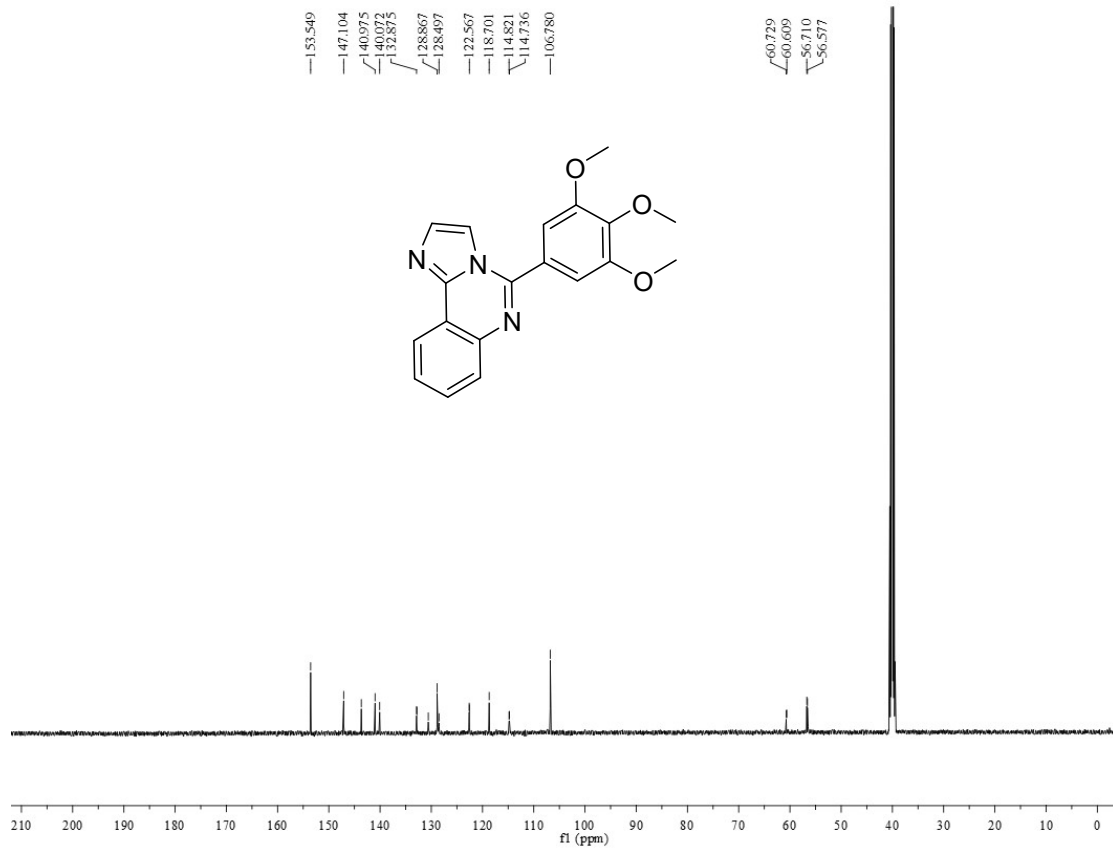

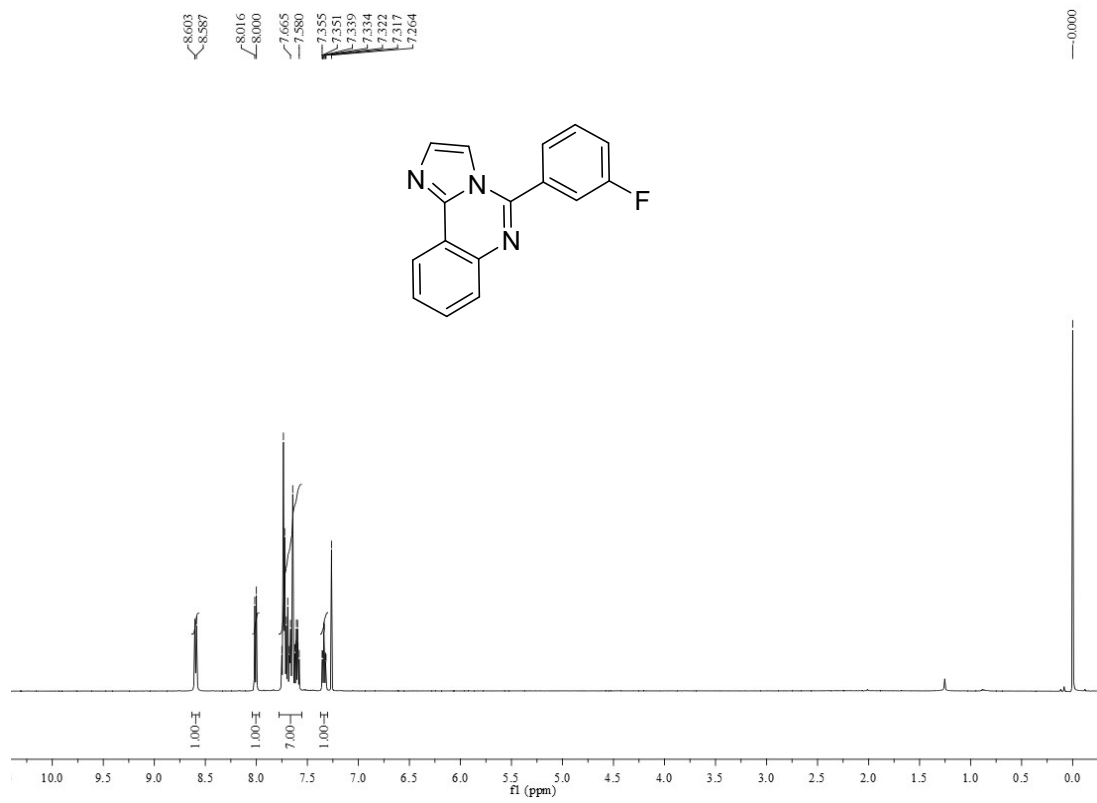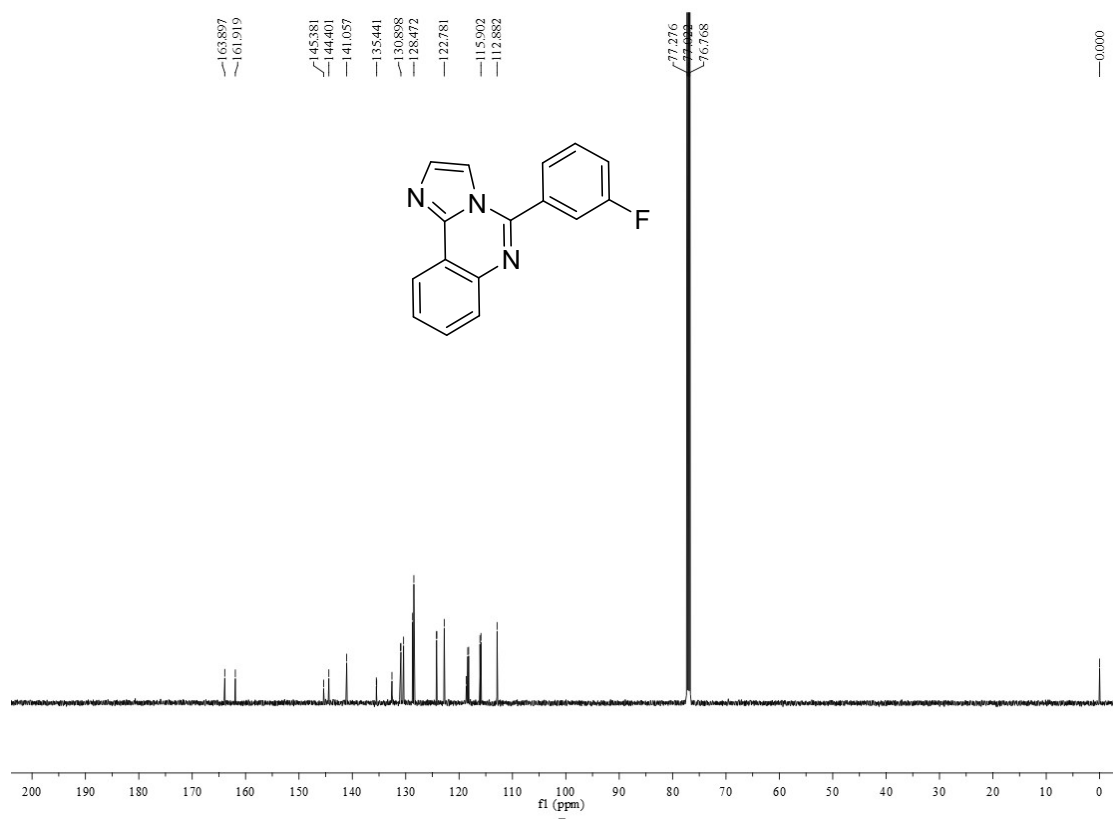



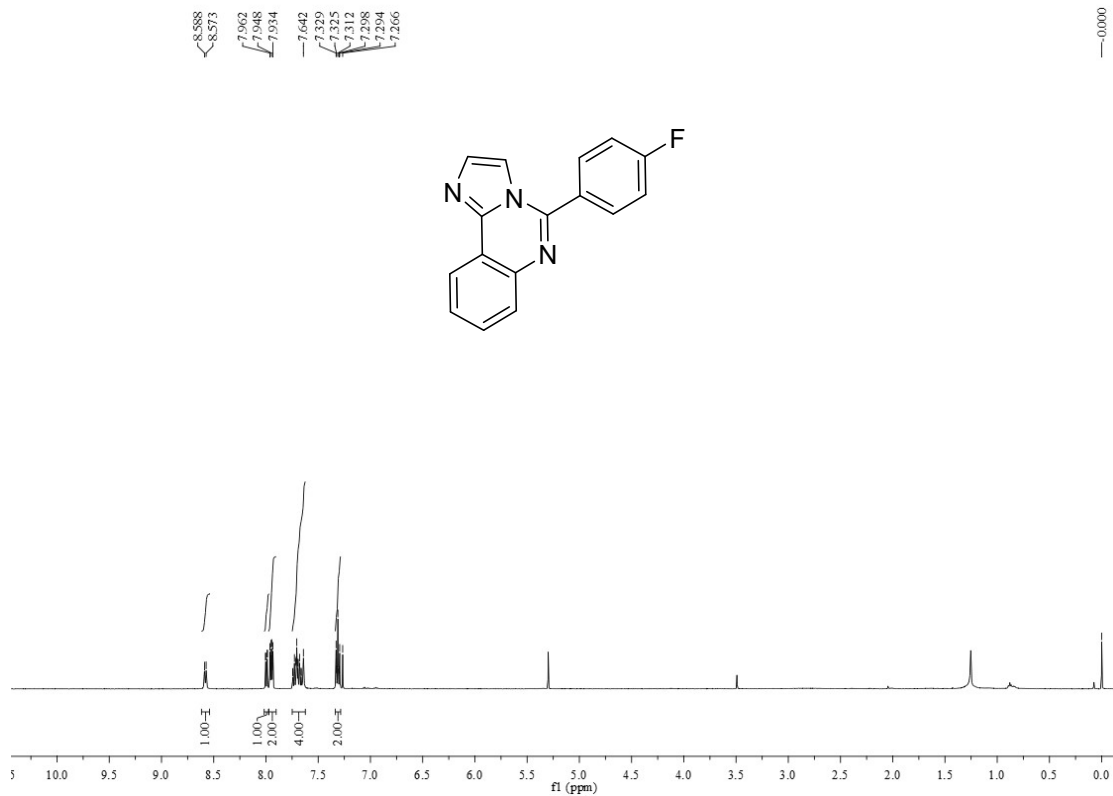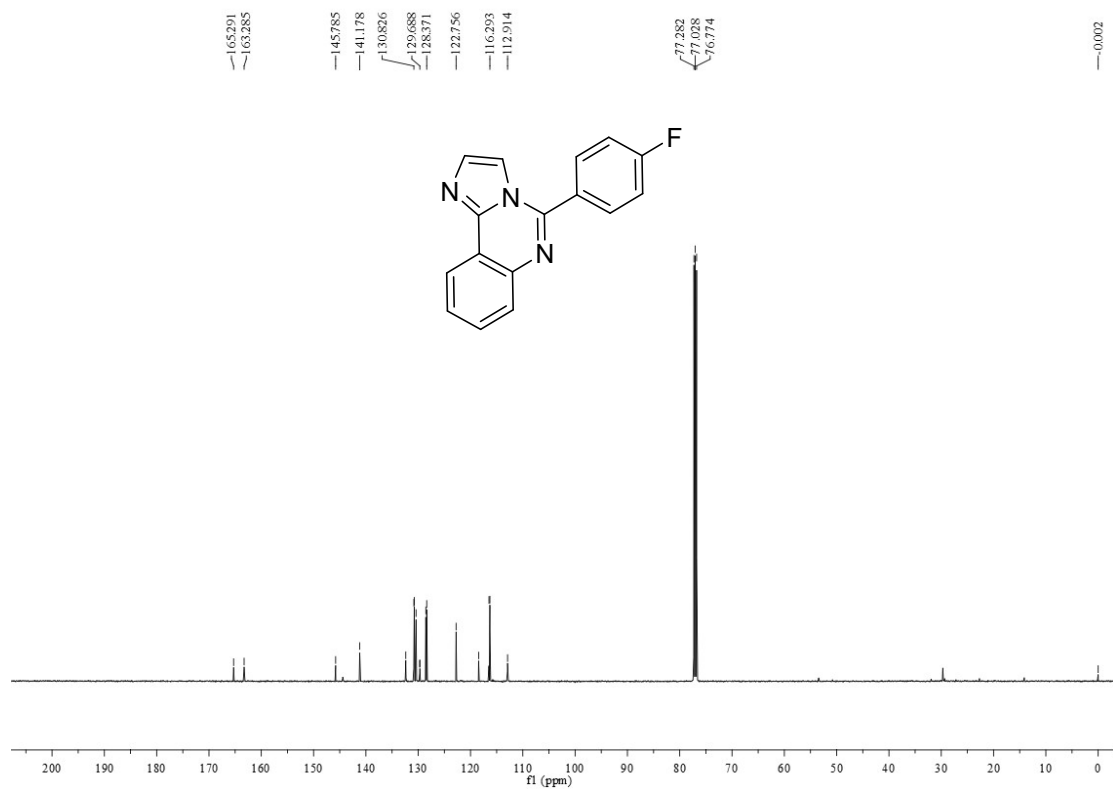

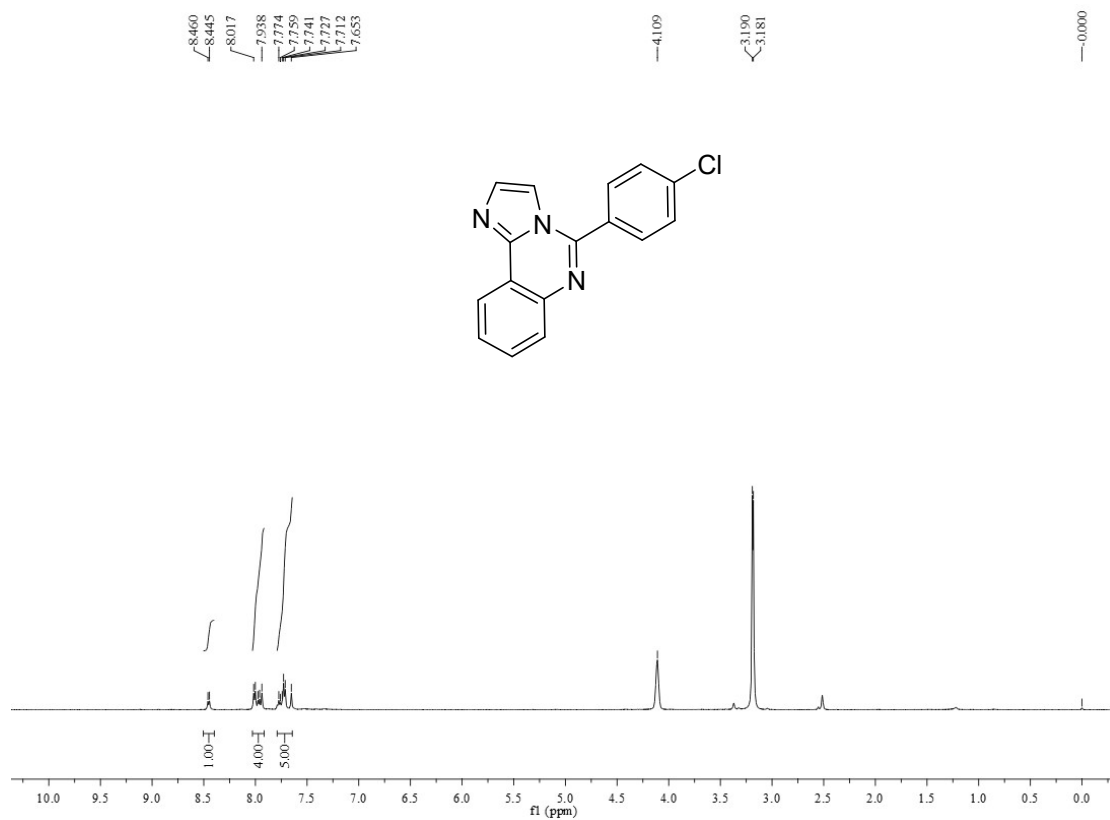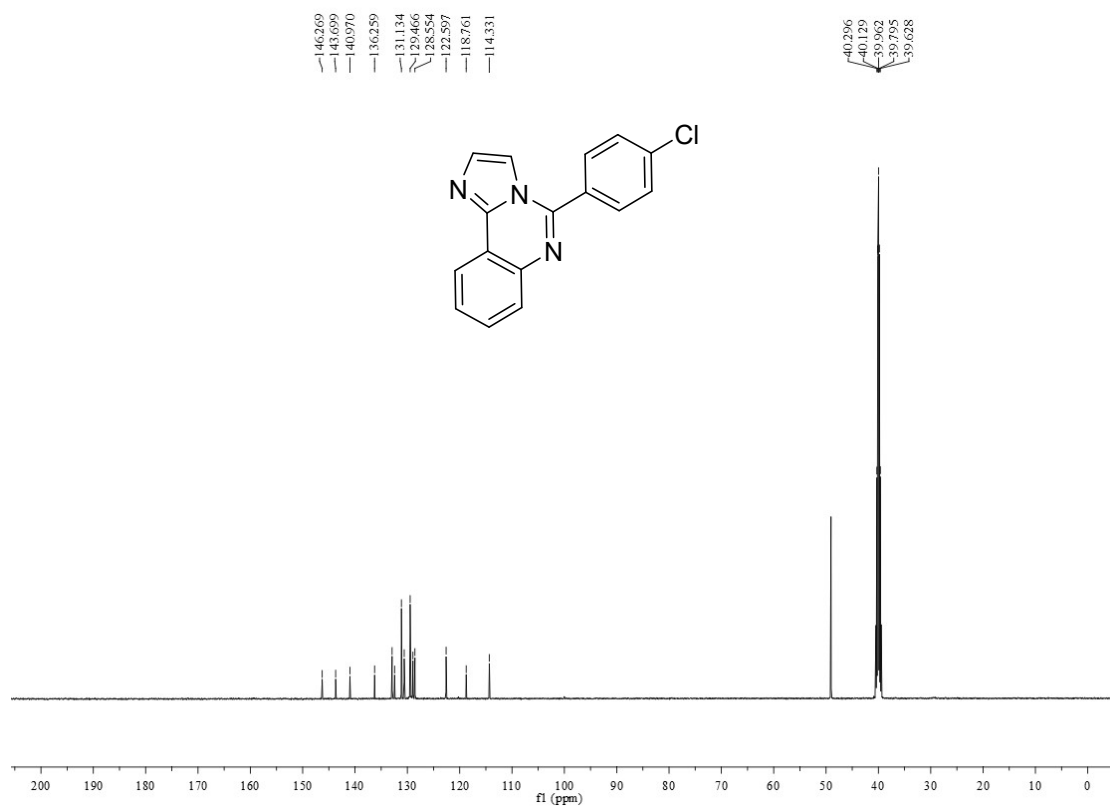



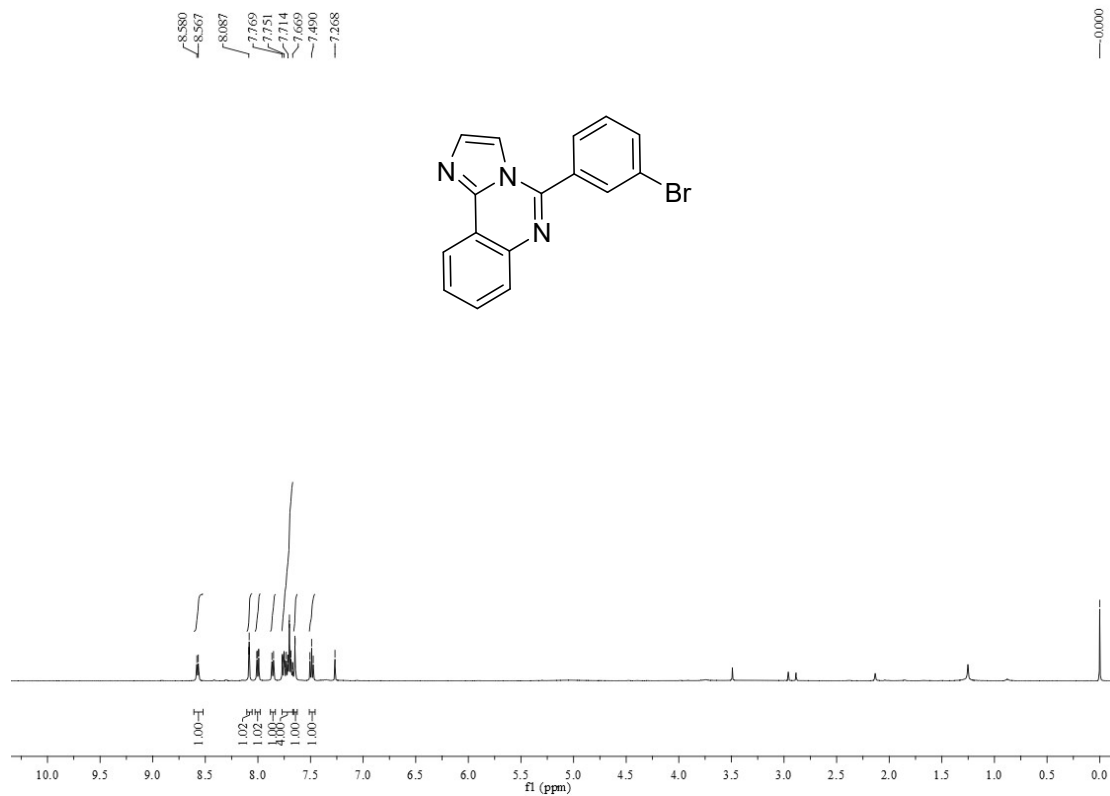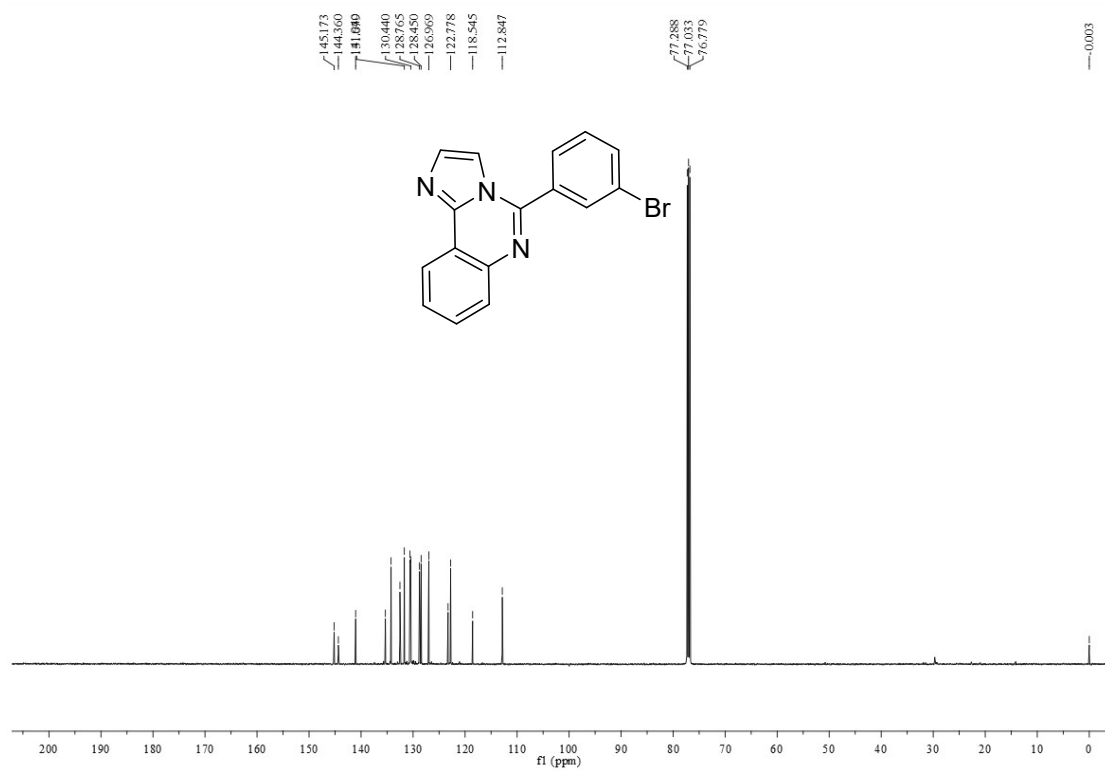

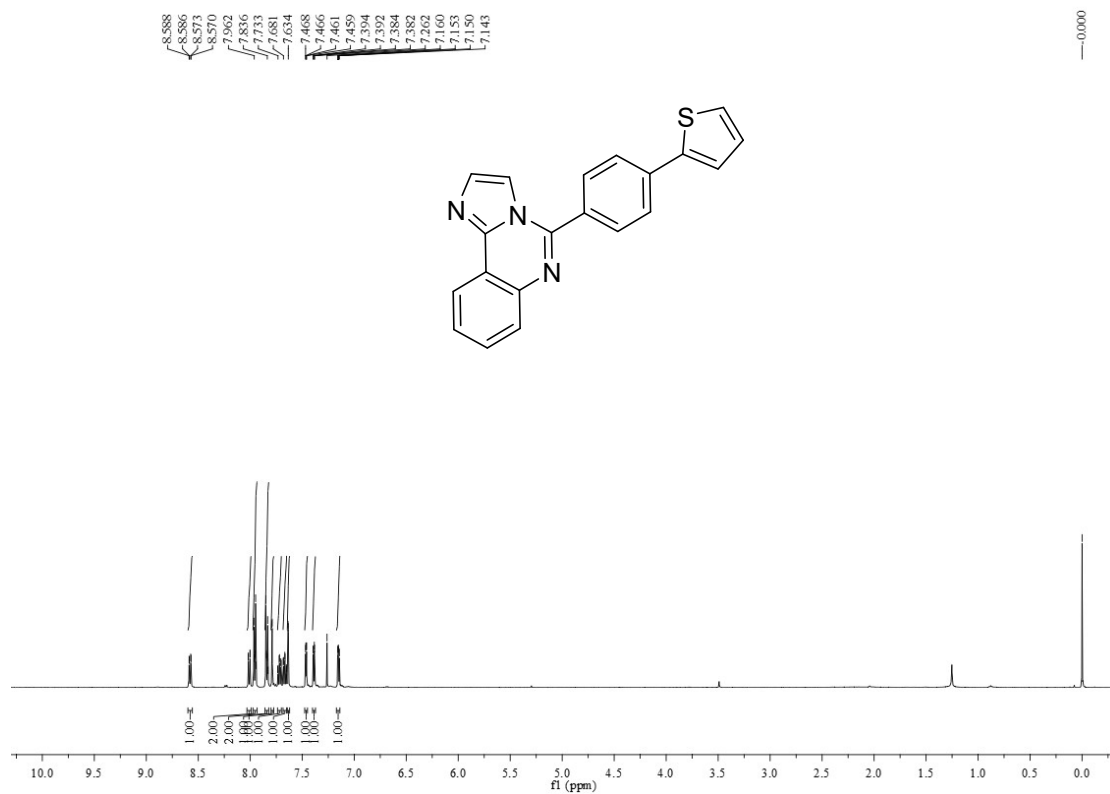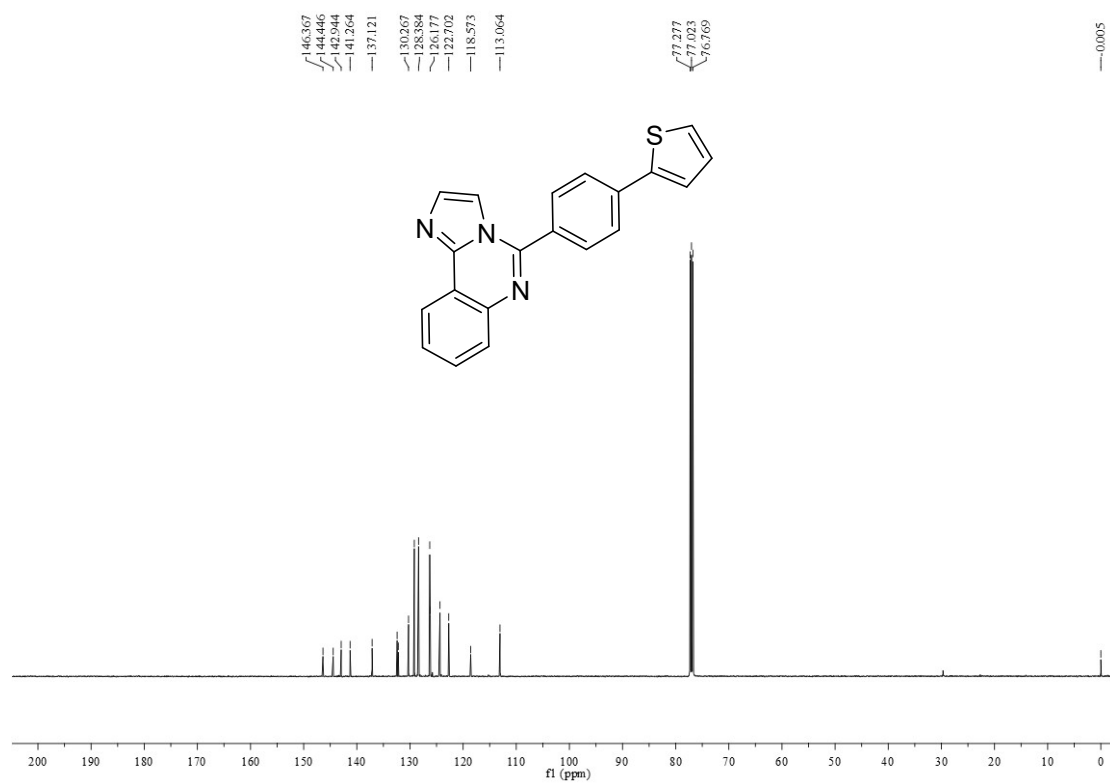

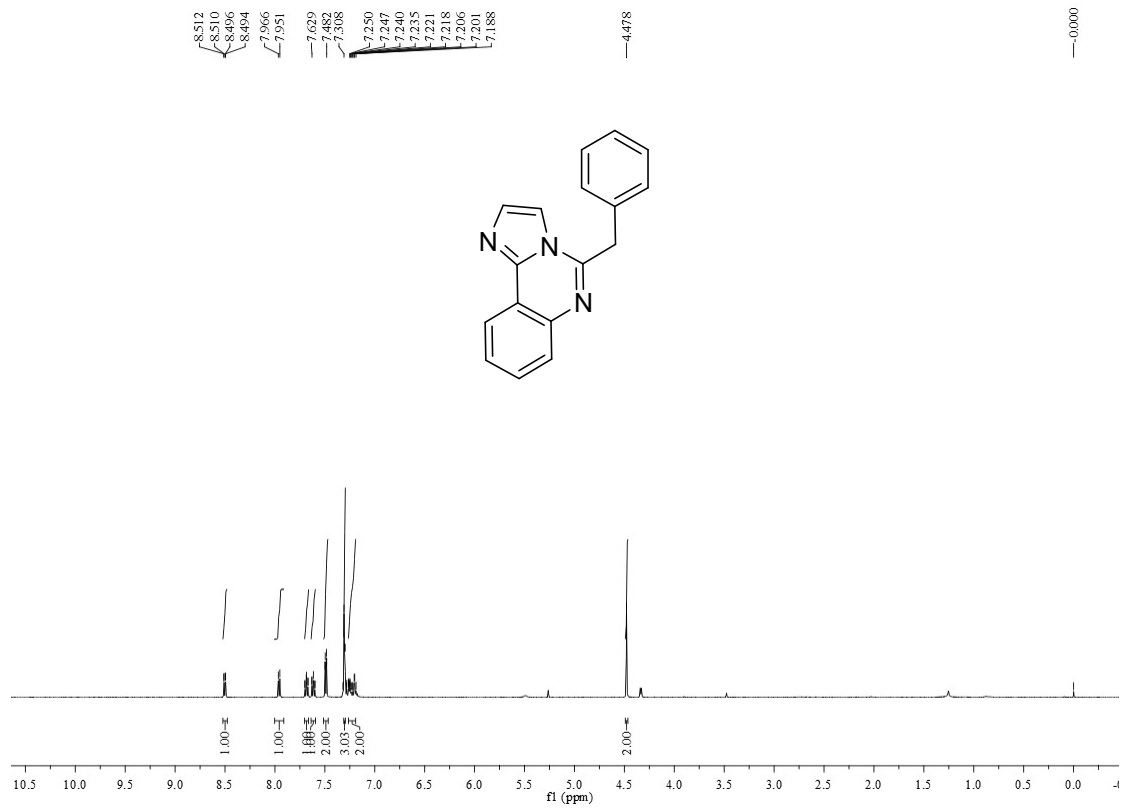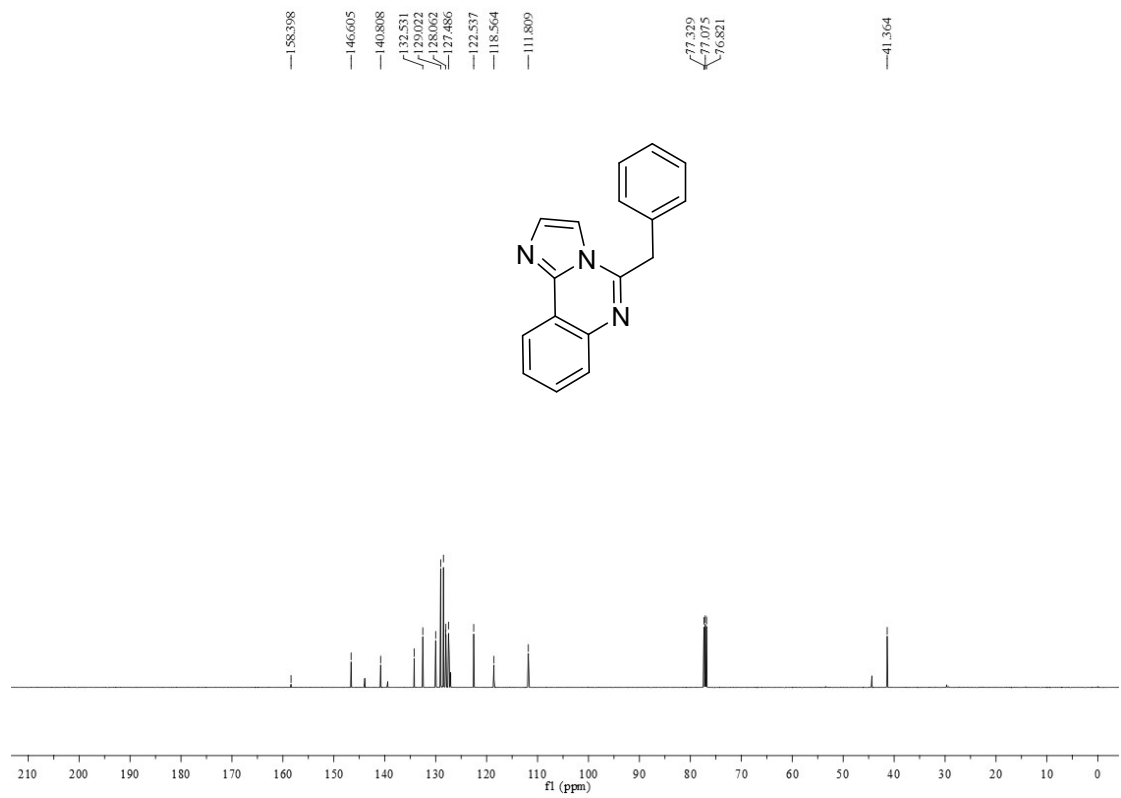

Supplement: d2ob00697a1.pdf [file d2ob00697a1.pdf]
